# Supplementary material
Source: publisher figshare collection journal article supplement (https://gsapubs.figshare.com/articles/dataset/_/22688023)
Supplement: Supplementary file 1 [file 1]

## Sheet: SIMS
nr.	sample	PHASE	map nr + sample + min	location	Li	B	F	Cl	Al	Ti	notes	map nr + sample + spot	B	d11B_NIST951	1s	B isotope vs trace analysis
				C/I/R/N	µg/g	µg/g	µg/g	µg/g	µg/g	µg/g			µg/g
1	HC123	OL	139-HC123-OL.DAT	C	2.33768	1.5537	59.174	2.716	1.06155	29.153	0	152_HC123-29-ol_x-2548y-212.ais	1.4596	-3.40821	1.8022	same grain
2	HC123	OL	141-HC123-OL.DAT	R	2.80632	2.91205	37.0047	4.24615	1.78104	19.6568	0	155_HC123-32-ol_x524y-1898.ais	3.46354	-3.45222	1.01991	same grain
3	HC123	OL	146-HC123-OL.DAT	C	1.98771	1.81676	63.0282	3.04516	2.49651	38.4193	0	156_HC123-33-ol_x-164y3833.ais	1.87595	-10.393	1.4831	same grain
4	HC123	OL	145-HC123-OL.DAT	N	2.21623	2.8478	53.7054	4.79306	2.1932	27.6576	0	157_HC123-34-ol_x1762y4307.ais	2.21419	-4.3143	1.42216	same grain
5	HC123	OL	143-HC123-OL.DAT	R	3.772	2.865	39.9521	2.91732	1.55739	19.7585	0	158_HC123-35-ol_x3166y5297.ais	3.00614	-1.89171	1.28149	same grain
6	HC123	OL	175-HC123-OL.DAT	C	3.52521	1.27567	60.9244	2.21968	0.922792	49.1373	0	74_HC123-OL_x7228y182.ais	0.999303	-5.79685	1.48084	same grain
7	HC123	OL	HC123 ol_10 _x91y-8328	I	2.07055	1.16846	62.2957	3.06383	3.02613	41.1199	near 175 (vol) and 74 (iso)
8	HC123	OL	HC123 ol_11 _x77y-8251	I	2.21943	1.59566	72.5824	5.07908	3.29971	35.1435	close to ol_10
9	HC123	OL	HC123 ol_02 _x413y-382	I	2.19422	1.35884	49.2573	12.0006	8.01911	23.0201	near 160 (iso)	160_HC123-37-ol_x-588y97.ais	1.90675	-6.31497	1.51266	same grain
10	HC123	OL	138-HC123-OL.DAT	C	2.23866	1.32987	52.5189	2.83593	2.18981	28.8455	0
11	HC123	OL	176-HC123-OL.DAT	C	3.28426	2.95235	53.4273	2.18328	0.874042	71.2312	0
12	HC123	OL	HC123 ol_03 _x-923y-30	C	3.64647	1.68893	49.2005	13.0674	2.94154	31.9334	laser spot
13	HC123	OL	HC123 ol_04 _x-789y29	I	2.32943	1.67701	57.9379	6.11127	4.10542	35.7244	adjacent grain
14	HC123	OL	HC123 ol_05 _x1653y-3182	C	1.44917	1.57795	50.9309	9.1636	2.58931	19.6439	laser spot
15	HC123	OL	HC123 ol_06 _x2015y-3256	N	2.01713	2.74412	61.064	3.01693	4.34579	17.3154	adjacent grain
16	HC123	OL	HC123 ol_07 _x2048y-2973	N	3.36326	4.73255	67.5876	6.06961	2.38094	77.5588	v. small adjacent grain
17	HC123	OL	HC123 ol_08 _x836y-4887	C	2.61138	1.81074	48.8269	8.17045	3.75115	22.8225	laser spot
18	HC123	OL	HC123 ol_09 _x569y-4863	N	2.15232	1.71098	44.4192	11.2309	2.57442	23.668	adjacent grain
19	HC123	OL	HC123 ol_12 _x-1756y6292	C	2.26697	2.4223	51.7372	9.59772	2.45947	23.2906	laser spot
20	HC123	OL	HC123 ol_13 _x-1585y6286	C	2.25524	2.15858	45.0265	10.3915	2.81205	26.283	same grain
21	HC123	LZD	137-HC123-SRP.DAT		0.0801138	55.8204	801.934	853.77	24.9851	40.3855	lizardite	153_HC123-30-lz_x-4248y-328.ais	44.1016	-2.89808	0.299927	same vein, nearby
22	HC123	LZD	HC123 srp_08 _x30y3269		0.09722	42.3544	900.609	385.304	42.3876	44.7443	near 137 (vol) and 153 (iso)
23	HC123	LZD	HC123 srp_06 _x2546y3923		0.0736247	60.4935	782.156	164.596	45.3532	29.2208	same vein as 08, 09
24	HC123	LZD	HC123 srp_09 _x-41y3343		0.0676054	33.6327	463.895	163.933	39.5135	22.7107	same vein
25	HC123	LZD	HC123 srp_10 _x-11y3458		0.0753433	64.685	1121.36	417.807	43.0499	27.2868	same vein
26	HC123	LZD	177-HC123-VEINSRP.DA		0.0490181	32.061	306.419	564.196	11.826	38.3145	0	75_HC123-SRP_x4513y-2783.ais	35.524	-3.55519	0.336677	nearby grain
27	HC123	LZD	HC123 srp_11 _x3436y-5609		0.060688	56.556	488.072	123.517	38.3855	23.2229	near 177 (vol) and 76 (iso)	76_HC123-SRP_x4437y-3131.ais	45.4061	-2.67306	0.275318	nearby grain
28	HC123	LZD	HC123 srp_01 _x58y8883		0.0993068	116.855	3116.88	572.822	55.7601	31.8323	laser spot
29	HC123	LZD	HC123 srp_02 _x1115y8534		0.111868	63.9126	2521.68	304.631	61.3572	40.8763	same vein
30	HC123	LZD	HC123 srp_03 _x1284y8914		0.0650651	50.7639	2239.22	190.242	41.2393	28.0266	same vein
31	HC123	LZD	HC123 srp_04 _x2917y8513		0.0376205	54.2139	1752.27	99.1623	47.6663	39.9701	same vein
32	HC123	LZD	HC123 srp_05 _x2897y6429		0.0805106	53.3634	1442.52	290.138	47.3147	43.5002	0
33	HC123	LZD	HC123 srp_07 _x6891y1850		0.0945623	46.2384	801.583	193.089	201.614	37.9463	0
34	HC123	LZD	HC123 srp_12 _x194y-7943		0.106522	35.6357	647.674	220.413	44.1098	28.9985	narrow (late?)
35	HC123	LZD	HC123 srp_13 _x-1533y7432		0.0654178	48.1482	1017.7	144.279	32.7897	51.4692	laser spot
36	HC123	LZD	HC123 srp_14 _x-1268y7482		0.0419747	36.4742	786.846	91.338	30.3405	48.8305	same laser spot
37	HC123	CHR	HC123 cr_01 _x1608y7497		0.162624	0.0349813	1.6201	2.57994	62457.4	2140.04	Al used as internal standard
38	HC123	CHR	HC123 cr_02 _x1583y7561		0.185249	0.0592484	3.01301	0	62457.4	2509.43	Al used as internal standard
39	HC123	CHR	HC123 cr_04 _x1387y7708		0.158314	0.0144577	2.09616	1.78178	62457.4	1931.83	Al used as internal standard
40	HC123	CHR	HC123 cr_05 _x1334y7791		0.173114	0.0309981	4.48622	2.54459	62457.4	2699.38	Al used as internal standard
41	HC123	CHR	HC123 cr_06 _x1310y7851		0.196952	0.0308472	2.51805	2.28703	62457.4	2663.89	Al used as internal standard
42	HC123	CHL	144-HC123-CHL.DAT		0.0626852	5.18509	424.812	57.5721	89969.1	151.067	0
43	HC123	CHL	140-HC123-CHL.DAT		0.0497944	0.848348	600.995	30.4885	97442.1	114.552	0	154_HC123-31-chl_x-326y-1400.ais	2.72169	-9.67186	1.08402	nearby grain
44	HC123	CHL	142-HC123-CHL.DAT		0.0547902	4.50777	601.936	103.362	87265.1	108.539	0	159_HC123-36-chl_x3666y6131.ais	1.45122	-0.801882	1.88712	same grain
45	HC123	CHL	HC123 unk_01 _x1057y7730		0.0906045	9.55508	753.007	34.0113	87443.4	177.347	B dropping, chlorite
46	HC104	OL	155-HC104-OL.DAT	C	2.96167	10.6866	22.4241	16.3124	10.5743	4.1879	0	186_HC104-73-ol_x-2380y227.ais	7.5028	-2.85312	0.770908	same grain
47	HC104	OL	156-HC104-OL.DAT	C	4.03725	11.3632	19.1838	14.0081	1.04159	4.24707	0	188_HC104-75-ol_x-2109y1127.ais	10.4622	-4.4873	0.669	nearby grain
48	HC104	OL	158-HC104-OL.DAT	N	3.4121	13.5759	21.3173	5.59104	0.90608	1.91386	0	190_HC104-77-ol_x-1550y1673.ais	19.5523	2.31176	0.530204	nearby grain
49	HC104	OL	161-HC104-OL.DAT	N	5.06341	20.1851	21.2663	22.3107	0.797572	2.79574		192_HC104-79-ol_x-2809y-1918.ais	14.6054	-0.832815	0.597479	nearby grain
50	HC104	OL	151-HC104-OL.DAT	C	2.97556	6.33101	29.4901	7.43127	0.885519	3.99737		193_HC104-80-ol_x-2879y-3674.ais	6.80062	-4.42634	0.760657	same grain
51	HC104	OL	155-HC104-OL.DAT	C	3.87817	6.46478	9.87075	9.18425	0.353536	3.93659		109_HC104-OLC_x2502y4426.ais	4.24522	-1.70012	0.62154	same grain
52	HC104	OL	156-HC104-OL.DAT	R	3.12035	8.49261	9.02743	0.5	0.315248	0.5	rim of 155	108_HC104-OLR_x2106y4153.ais	6.91578	0.169129	0.592071	same grain
53	HC104	OL	152-HC104-OL.DAT	C	3.69381	8.07412	19.2148	9.24395	0.833669	3.39615		112_HC104-OLC_x-369y1325.ais	5.73121	-2.88662	0.55095	same grain
54	HC104	OL	153-HC104-OL.DAT	C	2.98551	5.39262	16.3592	9.4228	0.797982	3.80126	inbetween 152 and 154	111_HC104-OLM_x-498y1434.ais	5.33735	-1.88376	0.688866	same grain
55	HC104	OL	154-HC104-OL.DAT	R	3.13609	11.3458	17.2467	4.74121	0.839533	8.60695	rim of 152	110_HC104-OLR_x-668y1328.ais	11.9688	-2.69803	0.44993	same grain
56	HC104	OL	158-HC104-OL.DAT	C	4.96535	0.514317	7.65586	11.5755	0.320822	4.20272		114_HC104-OLC_x-6936y1743.ais	0.998184	-4.63449	1.41387	same grain
57	HC104	OL	159-HC104-OL.DAT	R	3.01958	11.8317	12.0358	9.09895	0.490354	4.93239	rim of 158	115_HC104-OLR_x-6884y1961.ais	2.5323	-2.61429	0.942565	same grain
58	HC104	OL	160-HC104-OL.DAT	N	6.07792	14.5885	27.8872	12.7998	1.11173	2.7819
59	HC104	OL	152-HC104-OL.DAT	N	2.11274	27.2266	32.9327	18.7726	0.976132	2.08637	0
60	HC104	ATG	157-HC104-SRP.DAT		0.012848	5.70357	255.614	0.5	906.03	0.5	0	113_HC104-OL_x-36y-937.ais	7.86856	-6.23217	0.57846
61	HC104	ATG	154-HC104-SRP.DAT		0.0110928	6.54786	246.277	7.92394	1723.75	13.5068	0	187_HC104-74-srp_x-4280y-170.ais	10.5693	-0.0809903	0.609959	same grain
62	HC104	ATG	157-HC104-OL.DAT		0.0579102	9.37814	252.449	15.7142	1830.32	16.9057	0	189_HC104-76-srp_x-2811y917.ais	21.6186	5.32407	0.508602	same grain
63	HC104	ATG	159-HC104-OL.DAT		0.0145359	7.34751	256.929	11.1252	939.042	11.5879	0	191_HC104-78-srp_x-4535y1447.ais	7.91884	-0.442243	0.70762	same grain
64	HC104	ATG										195_HC104-82-srp_x-1809y-420.ais	12.8534	4.817	0.552787
65	HC104	LZD	160-HC104-VEINSRP.DA		0.674239	74.8695	533.507	926.631	24.6837	5.53511	0	116_HC104-SRP_x-7065y239.ais	42.4225	-3.52171	0.370956	nearby grain
66	HC104	LZD	153-HC104-SRP.DAT		0.593946	56.1864	86.4598	138.174	35.7838	3.65996	lizardite	194_HC104-81-lz_x-3143y-2120.ais	50.4742	-2.57556	0.361221	nearby grain
									0
67	HSS46	OL	HC46 ol_01 _x2022y-1456	N	1.54273	4.30717	7.9168	11.5351	2.42164	3.4479	near 221 (iso)	221_HSS46-100-ol_x1914y1454.ais	16.1533	-2.46577	0.566749	same grain
68	HSS46	OL	131-HSS46-OL.DAT	R	1.5259	2.69906	9.63198	2.94729	3.56822	2.37808	0					nearby grain
69	HSS46	OL	132-HSS46-OL.DAT	C	1.47293	3.2798	4.82452	1.40915	2.92846	2.68746	0	222_HSS46-101-ol_x3058y2208.ais	1.70239	-5.92816	1.71178	same grain
70	HSS46	OL	HC46 ol_02 _x1909y-3936	N	1.98545	17.3871	8.14771	13.3933	2.04494	2.47103	near 225 (iso)	225_HSS46-104-ol_x1828y3860.ais	19.684	-2.29417	0.477971
72	HSS46	OL	161-HSS46-OL.DAT	C	1.62649	2.10256	1.54806	4.68128	2.09032	3.89498	0	97_HSS46-OLC_x2395y6245.ais	2.93437	-0.673332	0.872124	nearby grain
71	HSS46	OL	129-HSS46-OL.DAT	I	1.46107	4.437	4.87193	1.423	2.41463	2.36594	same xtal as 97,98	226_HSS46-105-ol_x2634y4850.ais	6.03249	-3.27786	0.90394	same grain
73	HSS46	OL	162-HSS46-OL.DAT	I	1.73895	2.31248	5.1315	0.5	1.43358	0.5	near laser spot					nearby grain
74	HSS46	OL	HC46 ol_04 _x3612y-6341	R	1.54647	16.1675	9.90012	7.27188	1.43178	3.27059	near 98 (iso)	98_HSS46-OLR_x2756y6657.ais	13.6523	-5.14119	0.433214	same grain
75	HSS46	OL	HC46 ol_03 _x3005y-4107	N	1.58081	12.2573	6.83227	5.81378	1.6357	3.36514	near 227 (iso)	227_HSS46-106-ol_x2926y4092.ais	17.7519	-1.71077	0.518542	same grain
76	HSS46	OL	HC46 ol_05 _x6680y-5625	C	1.56357	2.04508	5.20458	1.41943	1.07586	3.81385	ol dissected by lizardite
77	HSS46	OL	130-HSS46-OL.DAT	N	1.25405	5.33927	3.7293	1.49774	4.36899	3.51557	0
78	HSS46	ATG	115-HSS46-SRP.DAT		0.0204843	16.7776	74.7712	11.5775	4616.45	23.7076	0	220_HSS46-99-srp_x782y2078.ais	16.0697	1.0548	0.50363	same grain
79	HSS46	ATG	114-HSS46-SRP.DAT		0.0131208	9.92613	52.0406	7.53159	4191.58	19.962	0	223_HSS46-102-srp_x1770y3650.ais	11.3259	-0.903457	0.680888	same grain
80	HSS46	ATG	164-HSS46-SRP.DAT		0.0177855	8.55146	59.2959	8.96543	2390.97	21.4745	0	95_HSS46-ATG_x1666y3036.ais	12.6433	-1.08309	0.517108	same grain
81	HSS46	ATG	113-HSS46-SRP.DAT		0.211696	19.5162	93.0019	36.8391	5434.15	20.9171	0	224_HSS46-103-srp_x1530y4198.ais	13.3854	-4.4958	0.627835	same grain
82	HSS46	ATG	HC46 srp_01 _x1845y-4205		0.00987776	10.0811	62.3674	3.97041	2606.18	14.1593	near 96 (iso)	96_HSS46-ATG_x1245y4343.ais	37.4093	3.67176	0.310253	nearby grain
83	HSS46	ATG	163-HSS46-SRP.DAT		1.49779	10.5597	70.1051	32.0458	4379.16	20.3859	0
84	HSS46	LZD	165-HSS46-VEINSRP.DA		0.6574	58.574	94.008	100.066	17.4736	1.60553	0	99_HSS46-SRP_x-2668y3074.ais	75.7972	-1.60267	0.209621	same grain
85	HSS46	LZD	116-HSS46-SRP.DAT		0.559758	34.4848	53.8219	66.9887	60.8597	3.27582		219_HSS46-98-lz_x130y1810.ais	41.6183	-1.91007	0.421752	same grain
86	HSS46	LZD	112-HSS46-SRP.DAT		1.76711	25.2943	53.2922	171.223	60.7404	7.83853	crack fill next to ol 129
87	HSS46	LZD	HC46 srp_02 _x6714y-5601		2.2473	23.5393	128.836	539.521	45.9735	7.74677	mesh, near ol_05
88	HSS46	LZD	117-HSS46-SRP.DAT		2.19157	72.3817	52.2063	441.879	45.3218	8.46695
89	HSS73	OL	136-HSS73-OL.DAT	N	3.43315	13.09	6.89407	3.90882	0.397465	1.59288	0	228_HSS73-107-ol_x1120y630.ais	12.2828	-3.10669	0.618606	same grain
90	HSS73	OL	134-HSS73-OL.DAT	N	1.29486	15.306	10.6516	8.55565	0.706855	1.04595	0	230_HSS73-109-ol_x-1969y2156.ais	13.2074	-5.25404	0.585036	adjacent grain
91	HSS73	OL	135-HSS73-OL.DAT	N	1.6749	13.7747	5.06648	2.71301	0.336218	1.19403	0	232_HSS73-111-ol_x-4561y1552.ais	16.1704	-4.07452	0.530311	same grain
92	HSS73	OL	HC73 ol_01 _x-2435y-5048	C	0.955989	6.13703	19.8458	8.5765	0.807422	2.17889		78_HSS73-OLC_x-798y5371.ais	5.55591	-5.94478	0.538847	same grain
93	HSS73	OL	HC73 ol_02 _x-2400y-5330	I	1.06077	12.6412	9.47292	10.1694	0.882309	2.72935		80_HSS73-OLM_x-754y5619.ais	10.5052	-5.20699	0.513972	same grain
94	HSS73	OL	HC73 ol_03 _x-2226y-5452	R	0.788358	14.7429	10.9206	2.87325	0.741404	1.66841		79_HSS73-OLR_x-671y5746.ais	15.0751	-3.30471	0.463043	same grain
95	HSS73	OL	133-HSS73-OL.DAT	N	1.1143	10.0287	3.22212	7.39453	0.422948	1.30176	0	233_HSS73-112-ol_x3528y2696.ais	10.5817	-6.85333	0.641845	adjacent grain
96	HSS73	OL	HC73 ol_04 _x-6664y-6916	C	1.13726	6.78694	12.4084	2.88557	0.502435	2.49652
97	HSS73	OL	HC73 ol_05 _x-6629y-6627	I	1.13671	12.5636	9.1369	4.37406	0.547656	6.11198
98	HSS73	OL	HC73 ol_06 _x-6562y-6421	R	1.1377	13.8301	9.14947	2.94531	0.470559	2.53756
99	HSS73	OL	172-HSS73-OL.DAT	C	1.28268	1.7591	7.36487	15.0869	0.376105	4.20238
100	HSS73	OL	174-HSS73-OL.DAT	I	1.38295	3.5331	4.08884	4.1215	0.126922	3.01357
101	HSS73	OL	173-HSS73-OL.DAT	R	1.25335	15.3975	4.18657	8.44002	0.194933	2.2344
102	HSS73	ATG	119-HSS73-SRP.DAT		0.0406828	5.30599	37.6795	1.49458	3132.82	11.1091	0	229_HSS73-108-srp_x-1843y1994.ais	7.15635	-3.92658	0.882552	same grain
103	HSS73	ATG										234_HSS73-113-srp_x3330y3228.ais	8.49921	-1.36783	0.779283
104	HSS73	ATG	171-HSS73-ATG.DAT		0.0245935	4.12439	39.7854	3.94458	1798.39	9.54771	0	77_HSS73-ATG_x3129y1320.ais	5.44371	-2.12874	0.61535	same grain
105	HSS73	ATG	120-HSS73-SRP.DAT		0.0419818	5.27937	38.3102	16.3127	3148.01	8.62978	0	231_HSS73-110-srp_x-4439y1838.ais	7.21096	-2.36537	0.948095	same grain
106	HSS73	ATG	118-HSS73-SRP.DAT		0.119975	8.69809	70.3279	83.6876	2721.98	10.3675	0
107	HSS73	ATG	170-HSS73.DAT		0.0476491	4.03235	22.1139		1930.12
108	HC87	OL	141-HC87-ol.DAT	R	1.28676	3.78522	8.93748	0.5	0.983609	0.5	0	10_10-HC87-OL_x-4965y80.ais	4.76246	-6.15082	0.885965	same grain
109	HC87	OL	138-HC87-ol.DAT	N	1.41461	10.7613	16.2803	6.42145	2.40594	4.31747	0	12_12-HC87-OL_x-5126y3371.ais	12.6576	-7.73449	0.481297	nearby grain
110	HC87	OL	139-HC87-ol.DAT	I	1.46136	3.2224	6.66108	7.55357	1.55075	5.58652	0	13_13-HC87-OL_x-3253y3650.ais	1.26613	-4.48181	1.3941	same grain
111	HC87	OL	135-HC87-ol.DAT	C	1.38326	2.6129	6.97066	9.36846	8.18624	8.97593	0	15_15-HC87-OL_x-4495y4876.ais	1.44471	-6.83321	1.39318	same grain
112	HC87	OL	HC87 ol_08 _x-1268y4252	N	1.81186	3.51778	10.9502	4.35244	20.7704	7.6322	near 17 (iso)	17_17-HC87-OL_x186y5947.ais	4.59167	-4.92829	0.695297	same grain
113	HC87	OL	143-HC87-ol.DAT	C	1.5965	0.477511	4.7849	14.4694	0.891168	5.59388	CORE
114	HC87	OL	145-HC87-ol.DAT	I	1.48117	0.412511	4.58043	0.5	1.20854	0.5	MID
115	HC87	OL	144-HC87-ol.DAT	I	1.32977	0.570017	4.7793	2.40874	0.815949	5.22295	RIM	20_20-HC87-OLR_x5794y-1328.ais	0.940355	-7.29167	1.8312	same grain
116	HC87	OL	HC87 ol_01 _x-6183y-3504	R	1.54875	1.20197	7.20979	11.0132	1.26196	8.08231	extended rim from 18-20 (iso)
117	HC87	OL	HC87 ol_02 _x-6310y-3656	R	1.6124	0.460582	7.6454	1.3887	1.18281	7.95272	ditto
118	HC87	OL	HC87 ol_03 _x-6247y-3835	N	1.57239	8.48478	12.356	5.58405	1.32156	4.14109	ditto, neoblast?
119	HC87	OL	HC87 ol_04 _x-6792y-2999	R	1.0805	2.77295	13.149	1.40477	1.03491	6.16351	extended rim from 18-20 (iso)
120	HC87	OL	HC87 ol_05 _x-6981y-2977	R	1.58062	5.84816	14.7236	14.059	1.44584	10.6893	ditto, outer rim
121	HC87	OL	HC87 ol_06 _x-7023y-2865	N	1.57575	5.63132	10.3359	12.7161	7.95577	2.04475	ditto, neoblast?
122	HC87	OL	HC87 ol_07 _x2020y-2799	N	1.55148	10.0613	13.1168	17.7235	1.09844	1.496	near 25 (iso)	25_25-HC87-OL_x-2569y-1206.ais	11.1737	-4.59038	0.52602	nearby grain
123	HC87	OL	146-HC87-ol.DAT	N	1.40381	9.25426	4.65363	7.03621	1.55287	8.16064	SMALL	21_21-HC87-OL_x5648y-237.ais	8.21485	-6.6784	0.570738	nearby grain
124	HC87	OL	147-HC87-ol.DAT	I	1.68156	2.57722	7.77406	0.5	0.941127	0.5	0	22_22-HC87-OL_x3831y-3420.ais	2.96314	-9.26379	0.970947	same grain
125	HC87	OL	148-HC87-ol.DAT	R	1.56166	5.51018	4.43014	2.23277	0.825096	5.62951	0	23_23-HC87-OL_x3367y-2875.ais	6.11352	-6.5993	0.73572	same grain
126	HC87	OL	136-HC87-ol.DAT		1.68717	4.32775	8.80204	4.43617	4.20082	5.92805	0
127	HC87	ATG	140-HC87-atg.DAT		0.137556	2.72731	77.1687	2.33355	5579.61	22.9461	0
128	HC87	ATG	HC87 srp_01 _x-6789y-8750		0.0187339	4.39634	76.217	5.01431	7717.04	45.9563
129	HC87	ATG	HC87 srp_02 _x-3379y-6028		0.0283846	6.24302	67.6158	17.7429	9903.27	55.3865
130	HC87	ATG	HC87 srp_04 _x-6486y-5406		0.0189498	4.93717	86.6411	6.33836	7154.91	38.21
131	HC87	LZD	HC87 srp_03 _x-759y4412		0.574342	24.9199	174.505	650.026	59.5865	11.1765	near 16 (iso)	16_16-HC87-VEIN_x-113y6045.ais	28.7977	0.698671	0.30749	nearby grain
132	HC87	LZD	142-HC87-veinsrp.DAT		1.83377	25.0803	25.9606	306.879	17.8018	12.3558	0	11_11-HC87-SRP_x-4359y473.ais	22.2295	-2.4576	0.419421	nearby grain
133	HC87	LZD	137-HC87-veinsrp.DAT		0.769397	36.426	171.592	247.861	17.7269	10.2793	0
134	HC87	LZD	149-HC87-veinsrp.DAT		0.450398	16.5248	48.4069	541.086	19.0776	10.4131	laser spot

## Sheet: LA-ICP-MS
	ol	ol	ol	ol	ol	ol	ol	ol		cr	cr	cr	cr		serp	serp	serp	serp
	HC87	HC87	HC104	HC104	HC123	HC123	HSS46	HSS46		HC87	HC104	HC123	HSS46		HC87	HC104	HC123	HSS46
		RSD		RSD		RSD		RSD							lzd	atg	vein	atg
SiO2	40	n=6	40	n=5	40	n=4	40	n=5							43	43	43	43
Cr2O3										50	50	50	50
		0.21069		0.633411		0.289334		0.089363
Li7	1.58334	0.133067	4.1908	0.151143	2.93652	0.0985294	1.71424	0.0521296		1.5231	1.26929	0.080062	0.807518		0.646714	0.0684727	0.115061	0.17436
Na23	<10	-	<10	-	<10	-	<10	-		32.6924	23.6351	31.1161	<10		52.6218	24.4392	90.4553	46.4702
Al27	<0.6	-	<0.6	-	<0.6	-	<0.6	-		109596	68174.6	70138.7	71170.4		4.9944	1248.62	238.448	3308.39
P31	55.23	0.024932	52.1933	0.0286556	48.9221	0.0351985	49.5457	0.029935		36.453	32.6581	37.0419	29.5467		68.8493	56.1113	56.744	57.1702
Ca43	35.7972	0.163679	20.7512	0.158999	28.1851	0.116852	25.1391	0.186282		291.164	217.067	347.734	161.498		482.7	4925.58	97.1458	1193.7
Sc45	2.67465	0.296952	2.63245	0.0886187	1.01031	0.101901	1.97773	0.112893		11.3083	4.19788	2.26948	3.51388		2.87914	5.55221	1.03497	6.61673
Ti49	7.68958	0.273779	5.51054	0.123115	27.1811	0.183746	3.64413	0.0919006		842.545	295.596	2509.67	217.142		8.4009	7.95233	55.0057	13.8983
V51	0.0793823	0.416192	0.348224	0.641535	0.155937	0.786433	0.141776	0.459517		641.649	1011.27	545.699	1020.27		<0.1	8.71145	0.312813	26.7835
Cr53	5.33726	0.24109	10.2139	0.267085	4.43544	0.262678	6.87006	0.107556		342097	342097	342097	342097		6.55452	238.98	77.3637	1714.2
Mn55	778.76	0.017209	973.584	0.150047	911.009	0.0333551	1069.87	0.121659		3548.49	3635.26	3103.35	3062.5	0	788.534	395.903	591.751	411.692
Co59	111.893	0.0218673	132.753	0.0312175	126.123	0.0166175	135.752	0.0475965		585.864	602.79	494.617	541.648		112.711	45.3001	90.4543	49.7925
Ni60	2874.31	0.0135388	2771.67	0.0203935	2981.46	0.0230982	2791.02	0.0109538		535.708	350.087	766.837	352.133		2961.55	1230.29	3121.82	1444.53
Cu65	0.105396	0.15103	0.0882385	0.133741	0.0997536	0.111998	0.106674	0.0522863		0.147677	1.02824	0.367007	0.144547		1.94113	0.0906591	28.536	0.139381
Zn66	11.1749	0.0765101	25.8735	0.0303591	15.2795	0.118363	35.8214	0.103612		1484.34	2809.52	1385.47	3617.7		6.53122	8.23396	5.98921	12.7246
Ga69	0.0340999	0.378725	0.0205929	0.10181	0.0291619	0.169352	0.0269148	0.0959356		19.1737	9.2486	22.8546	12.8343		1.47545	0.881284	0.472317	0.685332
As75	<0.15	-	<0.15	-	<0.15	-	<0.15	-		<0.15	<0.15	0.261094	<0.15		<0.15	0.91396	0.788481	1.9005
Sr88	0.000521447	4.59403	0.00141241	1.59496	0.0132431	0.107879	0.0029495	0.613678		0.0448329	0.0821866	0.265125	0.0702523		3.02241	3.57077	0.893046	1.33972
Y89	0.00721326	0.257695	0.00400252	0.668349	0.00500166	0.0953192	0.00358734	0.204444		0.00344276	0.0132487	0.0127367	0.00944388		0.00941185	0.00520984	0.106159	0.00203416
Zr90	0.0138786	0.287416	0.0198735	0.221378	0.0234591	0.255844	0.0109916	0.257869		0.148309	0.122998	0.153864	0.103763		0.00910265	0.02364	0.121531	0.0145959
Nb93	0.0042771	0.300832	0.0152138	0.220578	0.0665796	0.113012	0.00302268	0.396699		0.142115	0.101916	0.108008	0.0883673		0.0138414	0.00233984	0.226176	0.00123053
Mo95	0.0237211	0.260456	0.0217494	0.225455	0.0275597	0.137765	0.0290947	0.197753		0.109631	0.0826408	0.101482	0.0953554		0.0233844	0.0157171	0.0321427	0.00586462
In115	0.00626435	0.131084	0.00580802	0.102587	0.00683477	0.0509434	0.00590101	0.36292		0.00851396	0.0122935	0.0145817	0.00915231		0.00340662	0.00805705	0.00580002	0.0143394
Sn118	0.524956	0.104355	0.81098	0.108161	0.87026	0.0288282	0.886701	0.0747936		0.788771	1.12172	1.44258	1.04252		0.460946	0.487467	0.640576	0.57711
Sb121	0.00616593	0.21957	0.0114176	0.636313	0.0156469	0.172516	0.0136362	0.22933		0.0227906	0.0161255	0.097943	0.0370443		0.016404	0.175736	0.168757	0.321848

## Sheet: EPMA
Spot#	Comment	phase	X	Y	SiO2	TiO2	Al2O3	Cr2O3	FeO	MgO	CaO	MnO	NiO	CoO	ZnO	Total	Mg#	Cr#
1 / 1 .	HC123-CHR	chr	-16863	-34566	<0.01	n.a.	11.8049	50.6575	27.2319	8.5454	<0.005	0.4245	0.0907	0.0656	0.1213	98.9465	0.358756	0.742182
2 / 1 .	HC123-SRP	lzd	-19496	-10514	42.431	n.a.	<0.01	<0.007	1.3098	42.4859	0.0085	0.0195	0.3225	n.a.	n.a.	86.5882	0.983002
3 / 1 .	HC123-OL	ol	-19529	-10284	40.7183	n.a.	<0.01	<0.007	7.5931	50.8313	<0.005	0.1211	0.3924	n.a.	n.a.	99.6656	0.922692
7 / 1 .	HC104-SRP	atg	9852	-28415	43.1617	n.a.	0.6268	0.4396	2.6926	38.5364	<0.005	0.0171	0.1882	n.a.	n.a.	85.6696	0.962288
4 / 1 .	HC104-SRP	atg	-17955	22187	44.3174	n.a.	0.1337	0.0285	2.6048	39.3526	<0.005	0.0129	0.1794	n.a.	n.a.	86.6332	0.964203
5 / 1 .	HC104-SRP	lzd	-18055	22132	41.9364	n.a.	<0.01	<0.007	1.7986	41.2366	0.0084	0.0371	0.3738	n.a.	n.a.	85.4067	0.97612
6 / 1 .	HC104-OL	ol	-17950	21952	41.0437	n.a.	<0.01	<0.007	8.4929	50.4601	<0.005	0.1452	0.3886	n.a.	n.a.	100.541	0.91374
8 / 1 .	HC104-OL	ol	9803	-28381	41.0639	n.a.	<0.01	<0.007	8.271	50.6284	<0.005	0.1379	0.3845	n.a.	n.a.	100.491	0.916061
1 / 1 .	HSS46-lath-01	atg	8695	30019	43.0567	n.a.	0.9156	<0.007	2.9917	38.607	<0.005	0.0098	0.1689	n.a.	n.a.	85.7579	0.958346
2 / 1 .	HSS46-srp-01	lzd	8693	30052	39.3894	n.a.	<0.01	<0.007	4.2124	40.4253	0.0166	0.1019	0.3394	n.a.	n.a.	84.4922	0.944781
5 / 1 .	HSS46-srp	lzd	8639	30207	35.1963	n.a.	<0.01	<0.007	5.7629	40.7498	0.0137	0.1069	0.3404	n.a.	n.a.	82.191	0.926508
6 / 1 .	HSS46-srp	lzd	21008	39129	37.55	n.a.	<0.01	<0.007	6.2268	40.08	0.0123	0.0871	0.3135	n.a.	n.a.	84.2838	0.919845
3 / 1 .	HSS46-ol	ol	8700	30080	41.2291	n.a.	<0.01	<0.007	9.5105	49.6777	0.0058	0.1584	0.404	n.a.	n.a.	100.994	0.903033
4 / 1 .	HSS46-ol	ol	8741	30133	40.9832	n.a.	<0.01	<0.007	9.395	49.4664	0.0067	0.163	0.3861	n.a.	n.a.	100.405	0.903727

## Sheet: G51169
De Hoog, J.C.M., et al., 2023, Mantle wedge olivine modifies slab-derived fluids: Implications for fluid transport from slab to arc magma source: Geology, https://doi.org/10.1130/G51169.1
