# Supplementary material
Source: publisher figshare collection journal article supplement (https://gsapubs.figshare.com/articles/dataset/_/22688023)

HC104

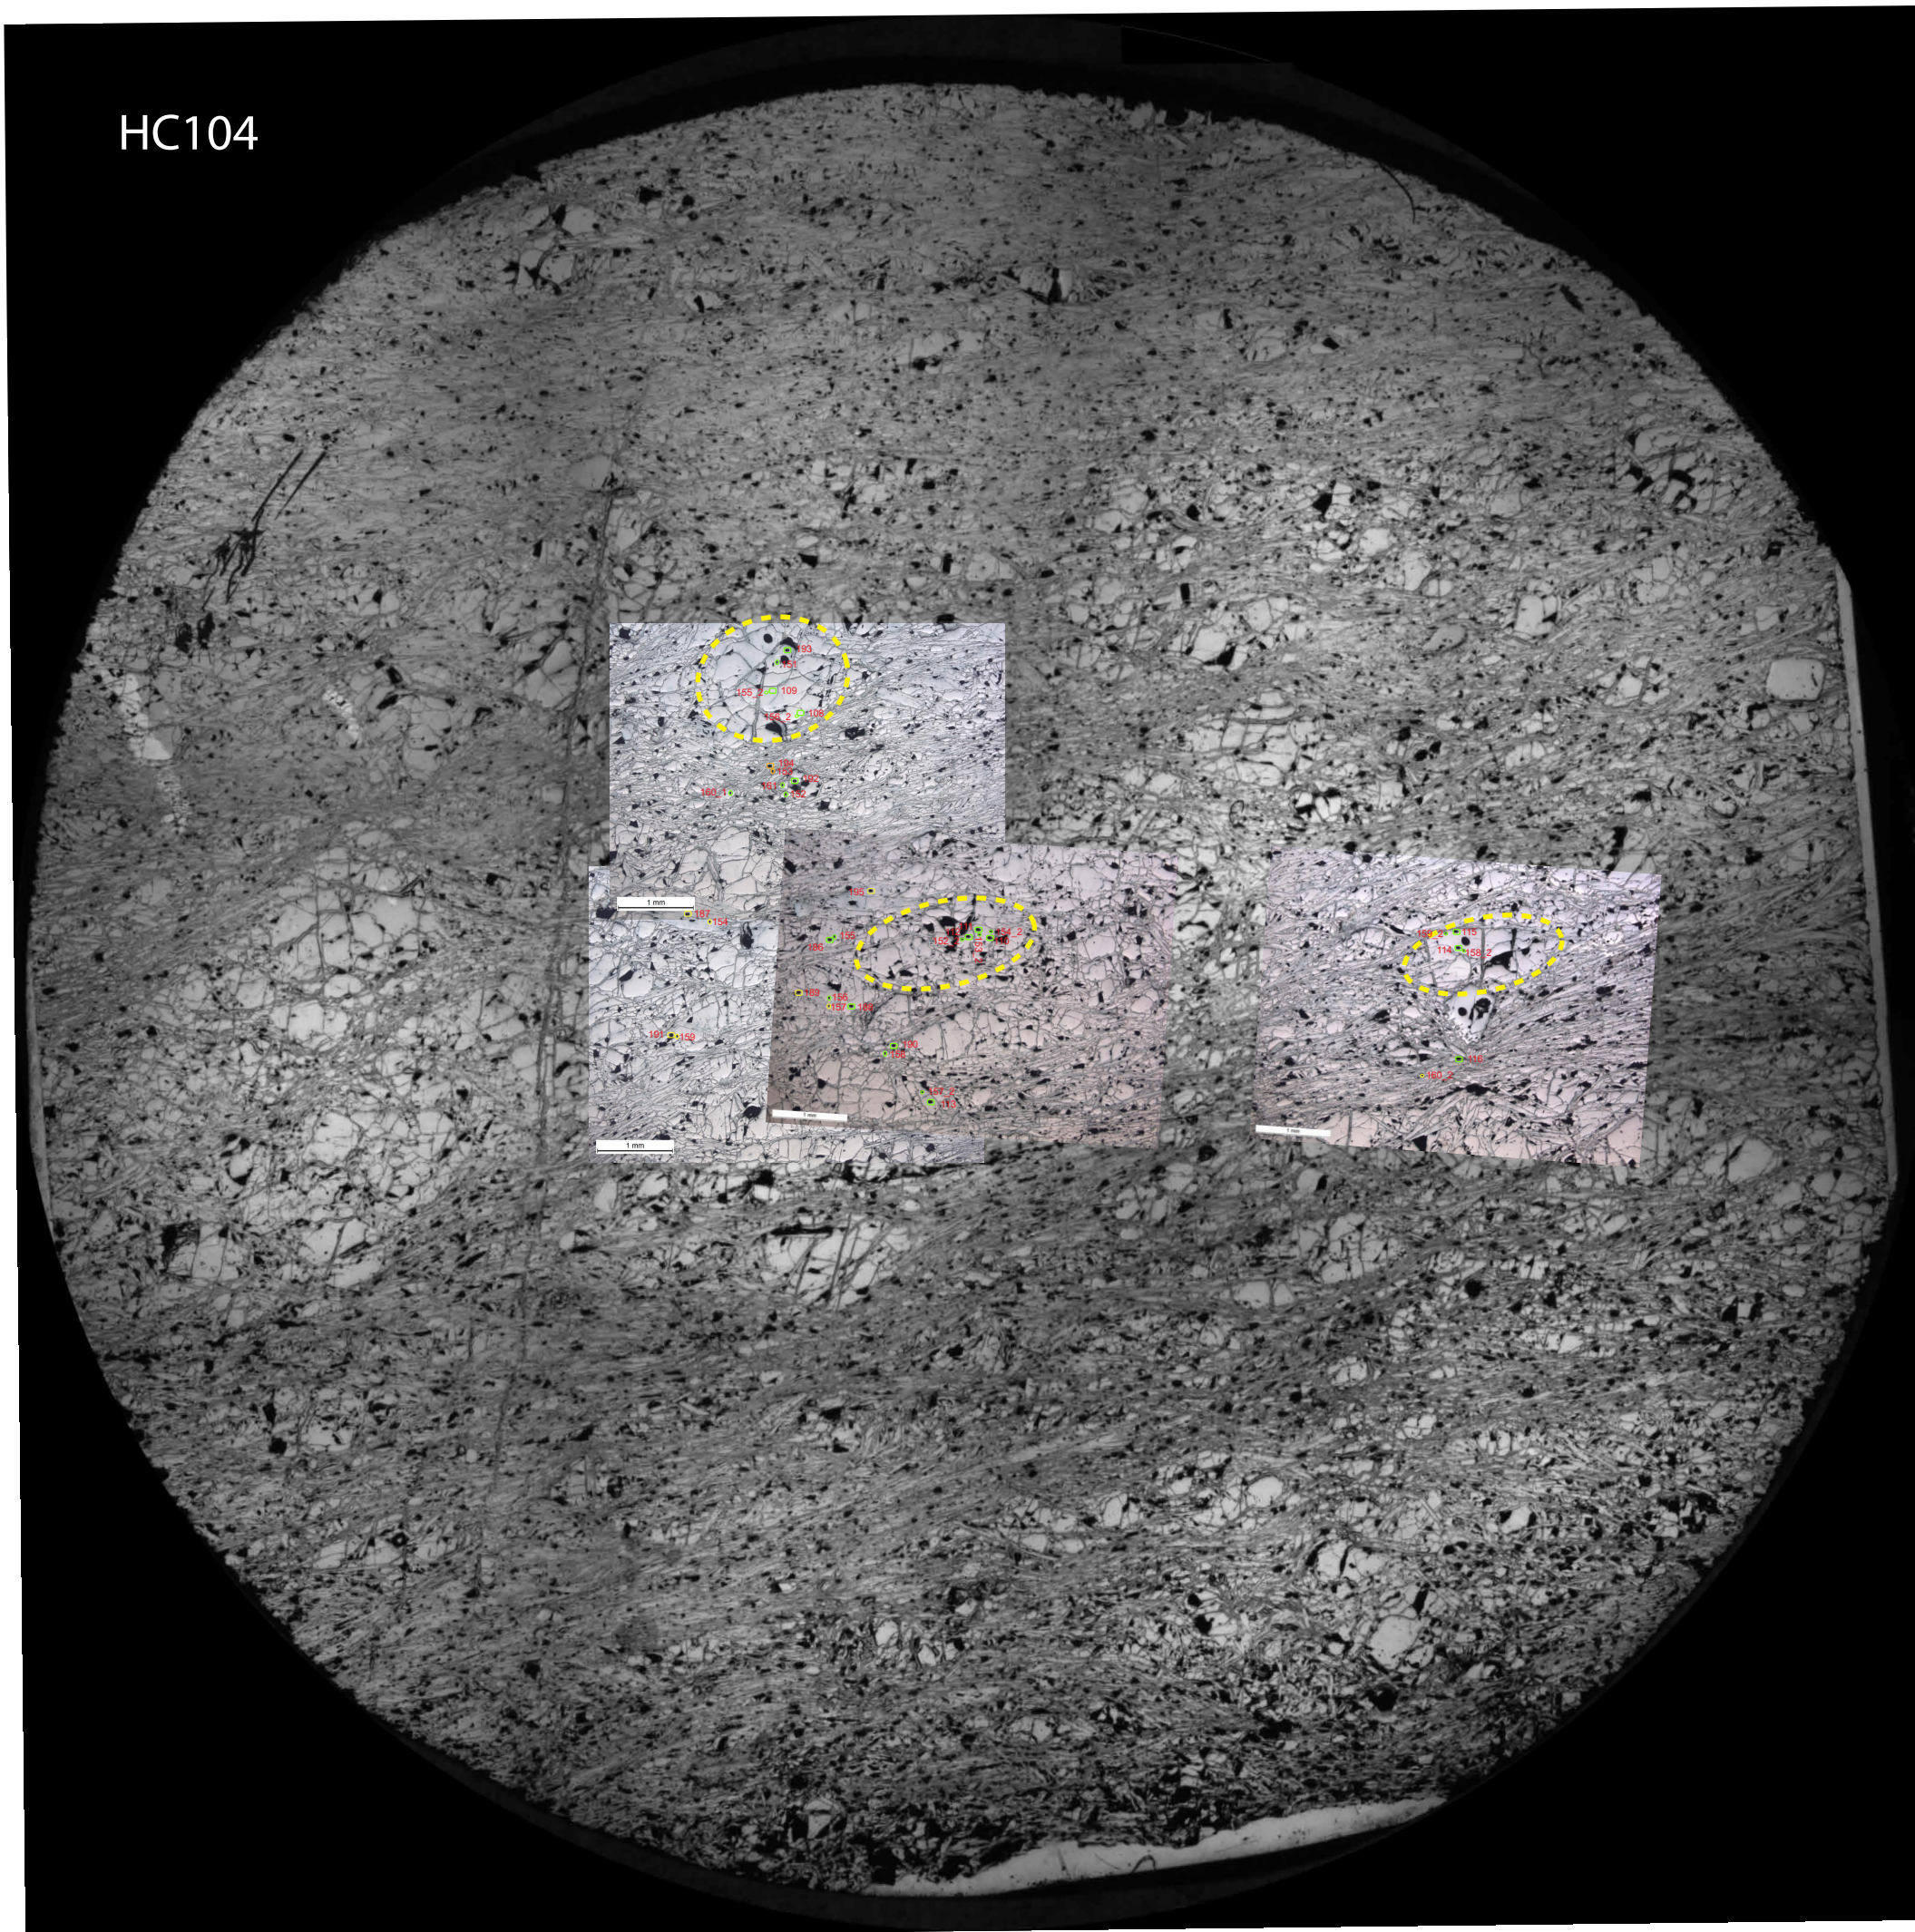



HC123

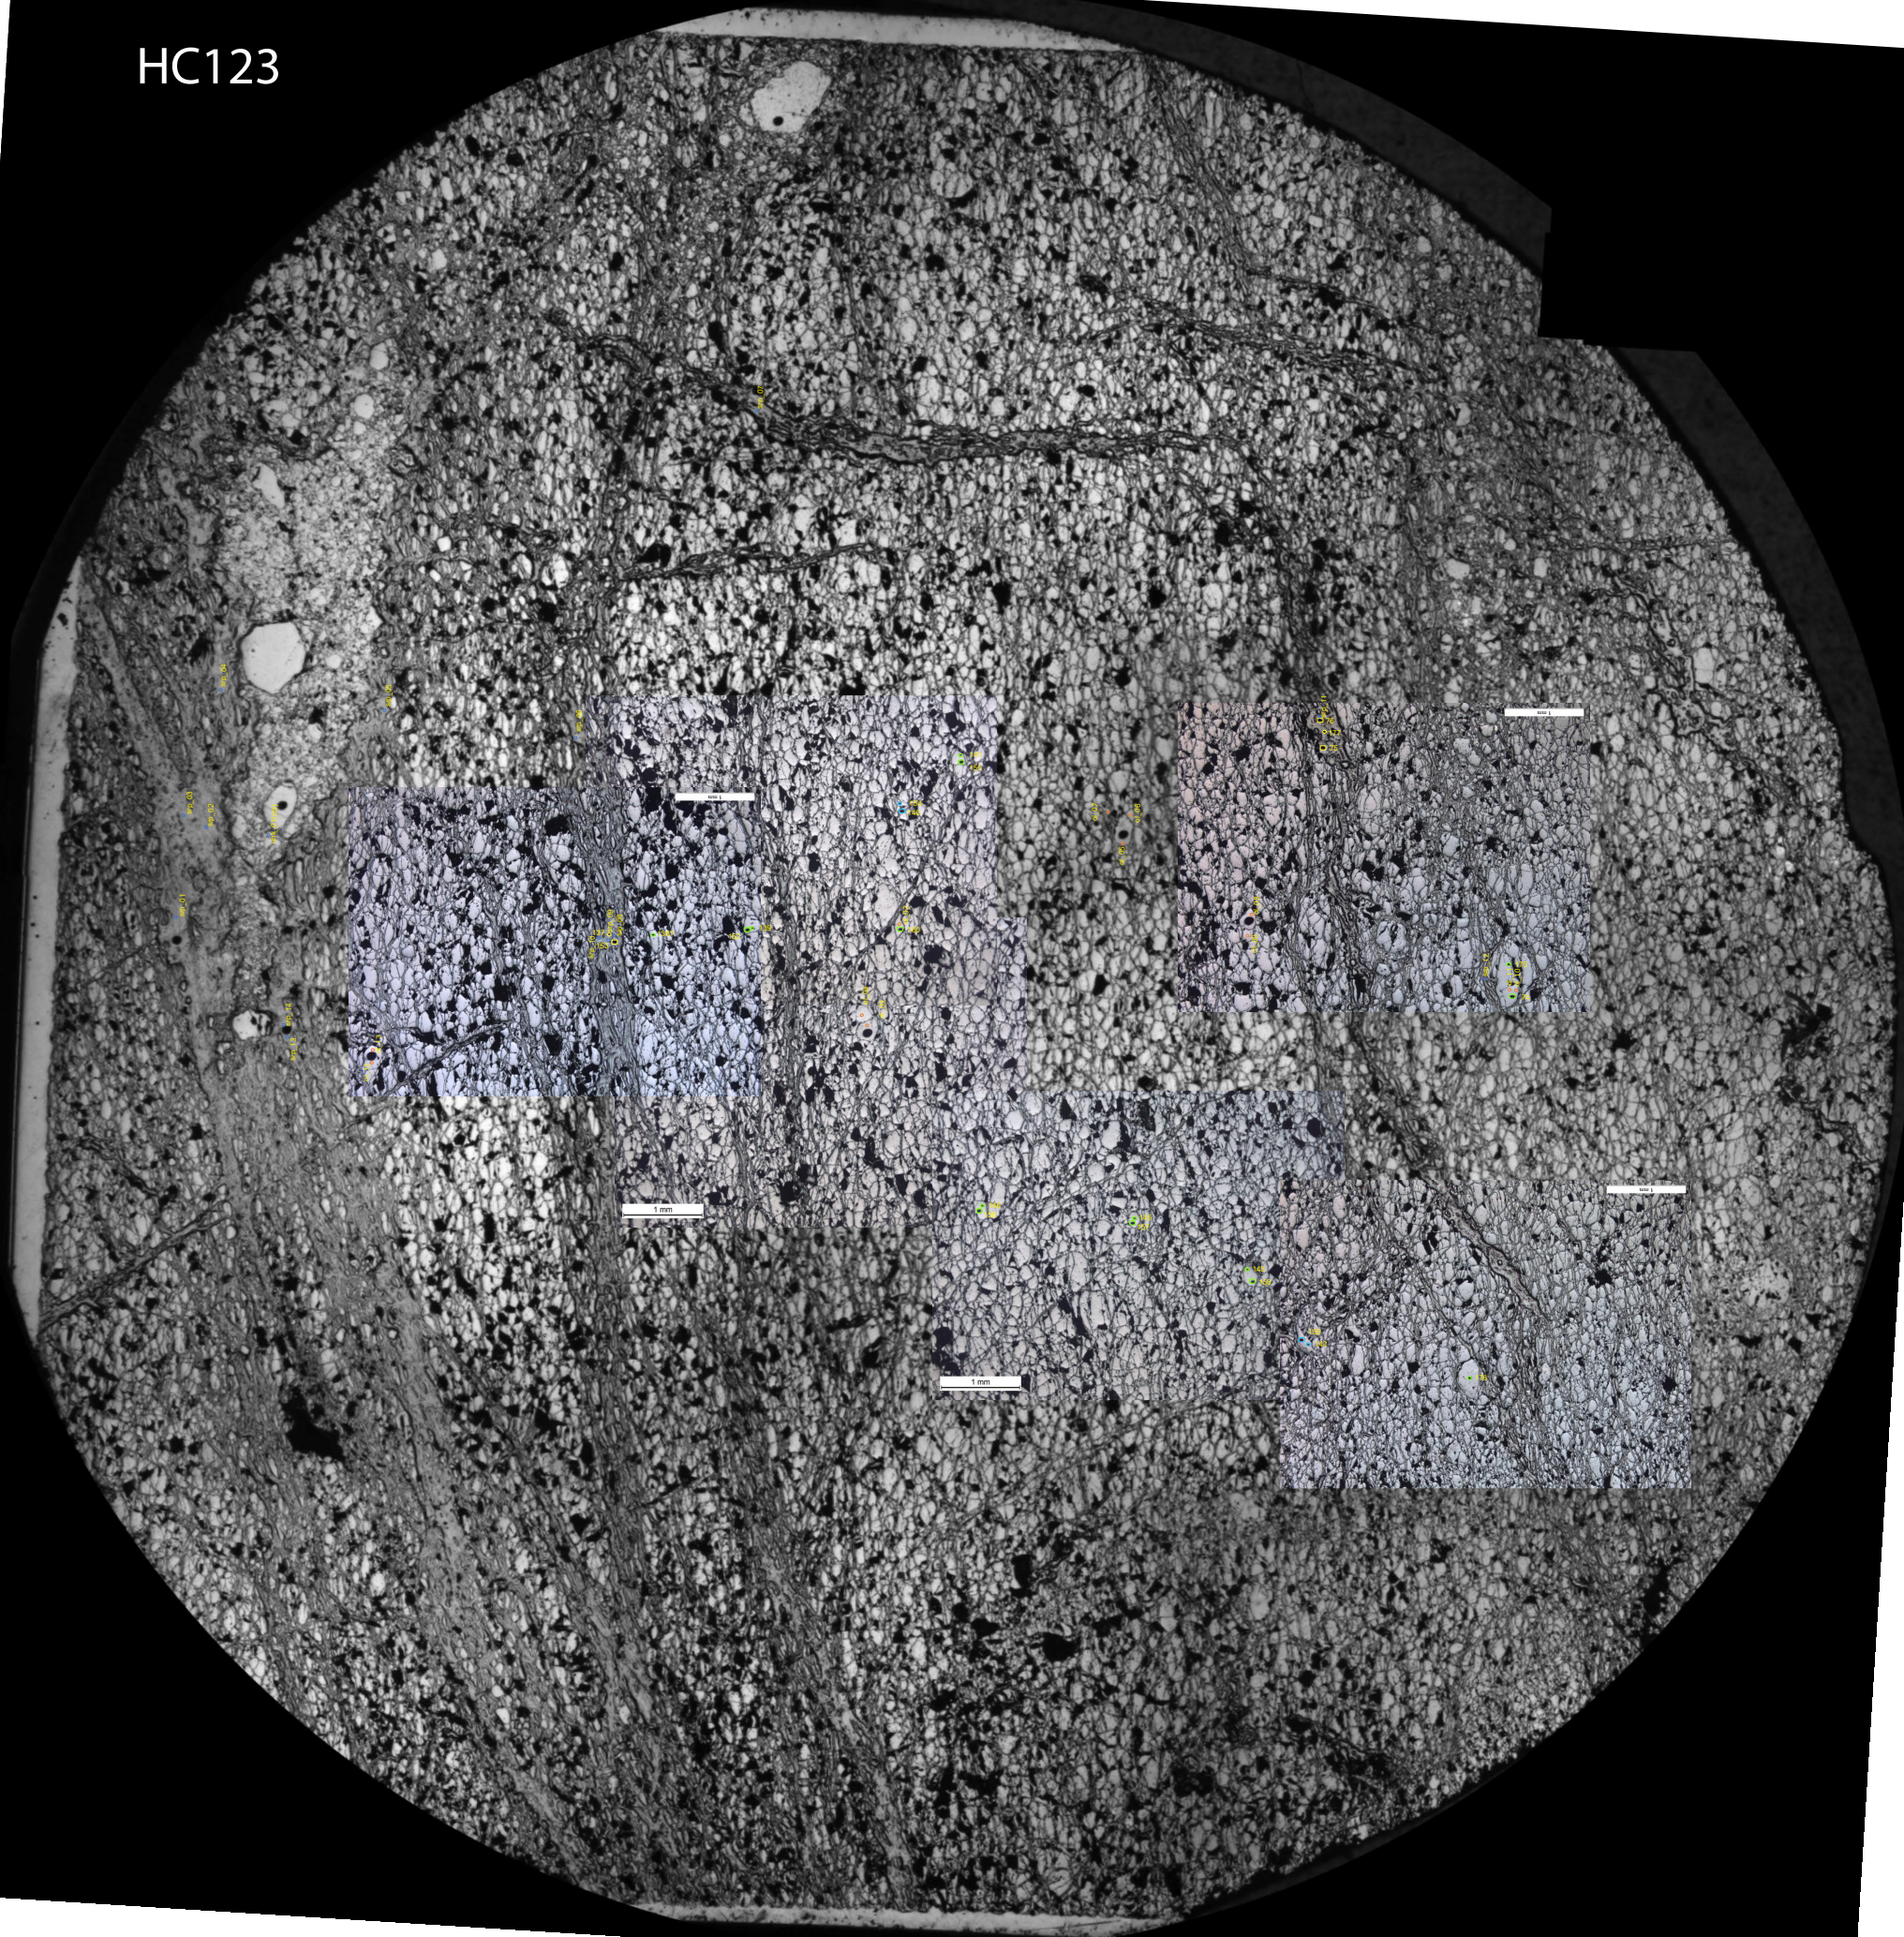



HC87

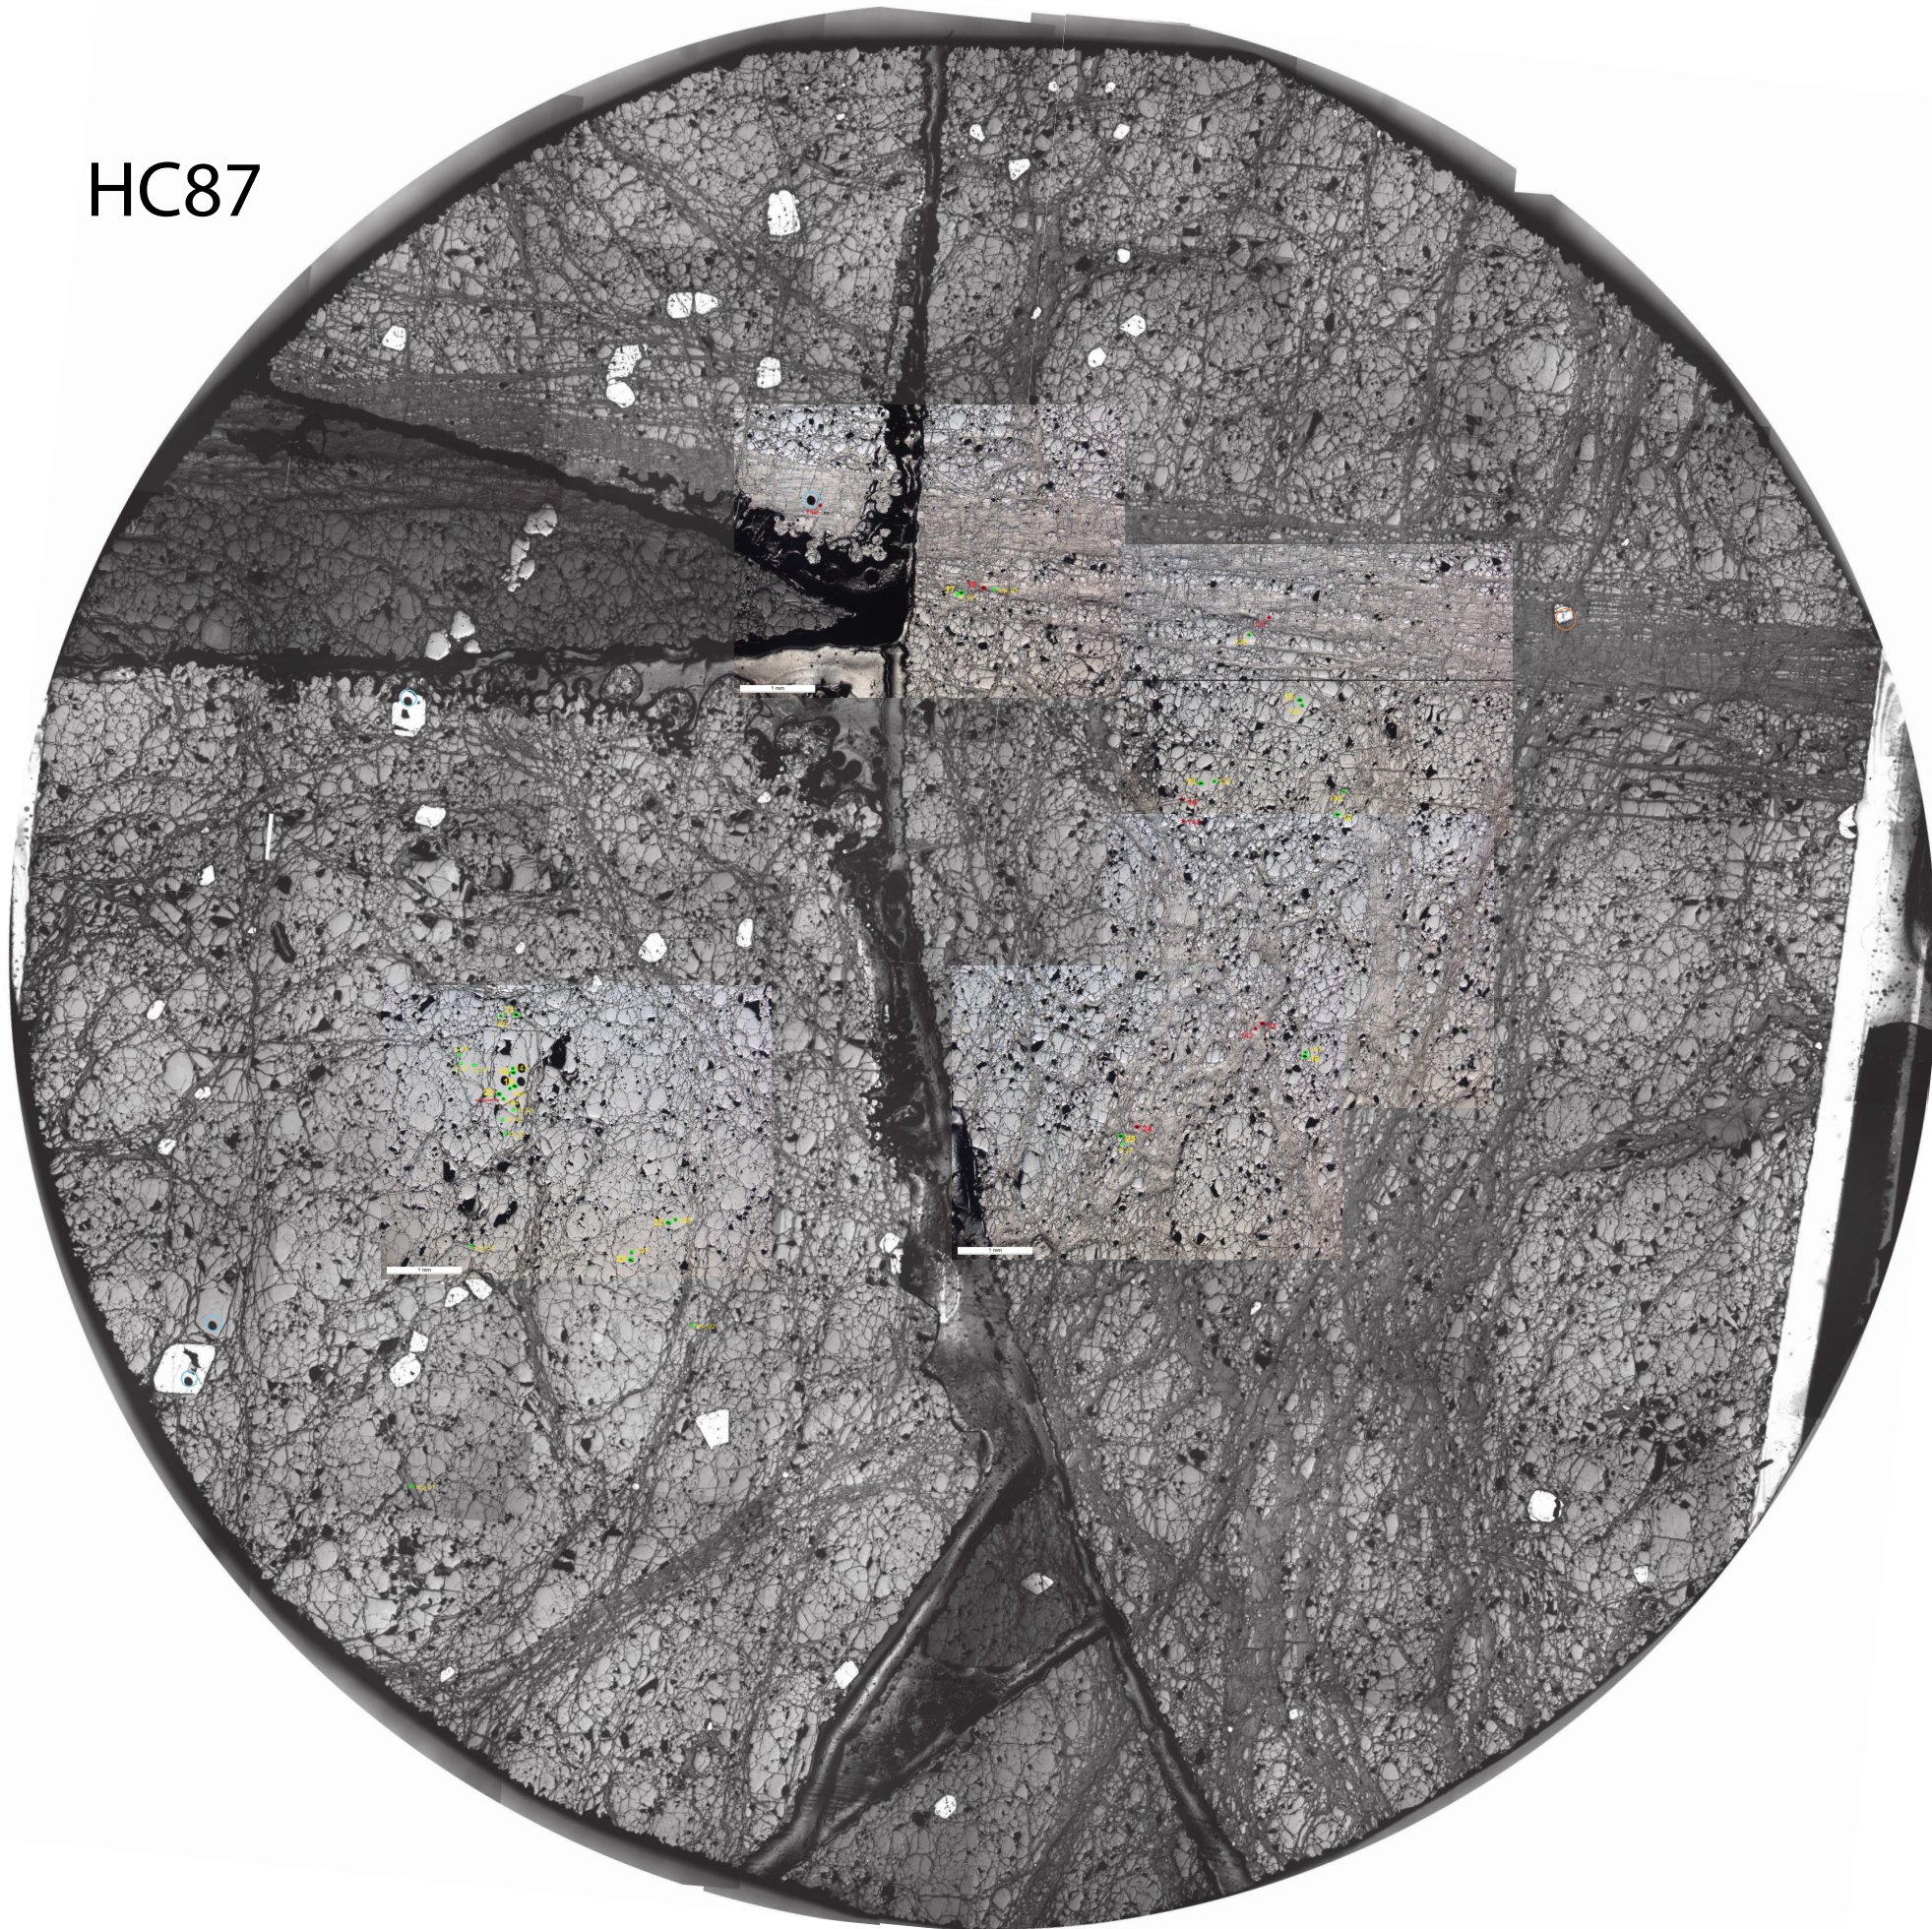



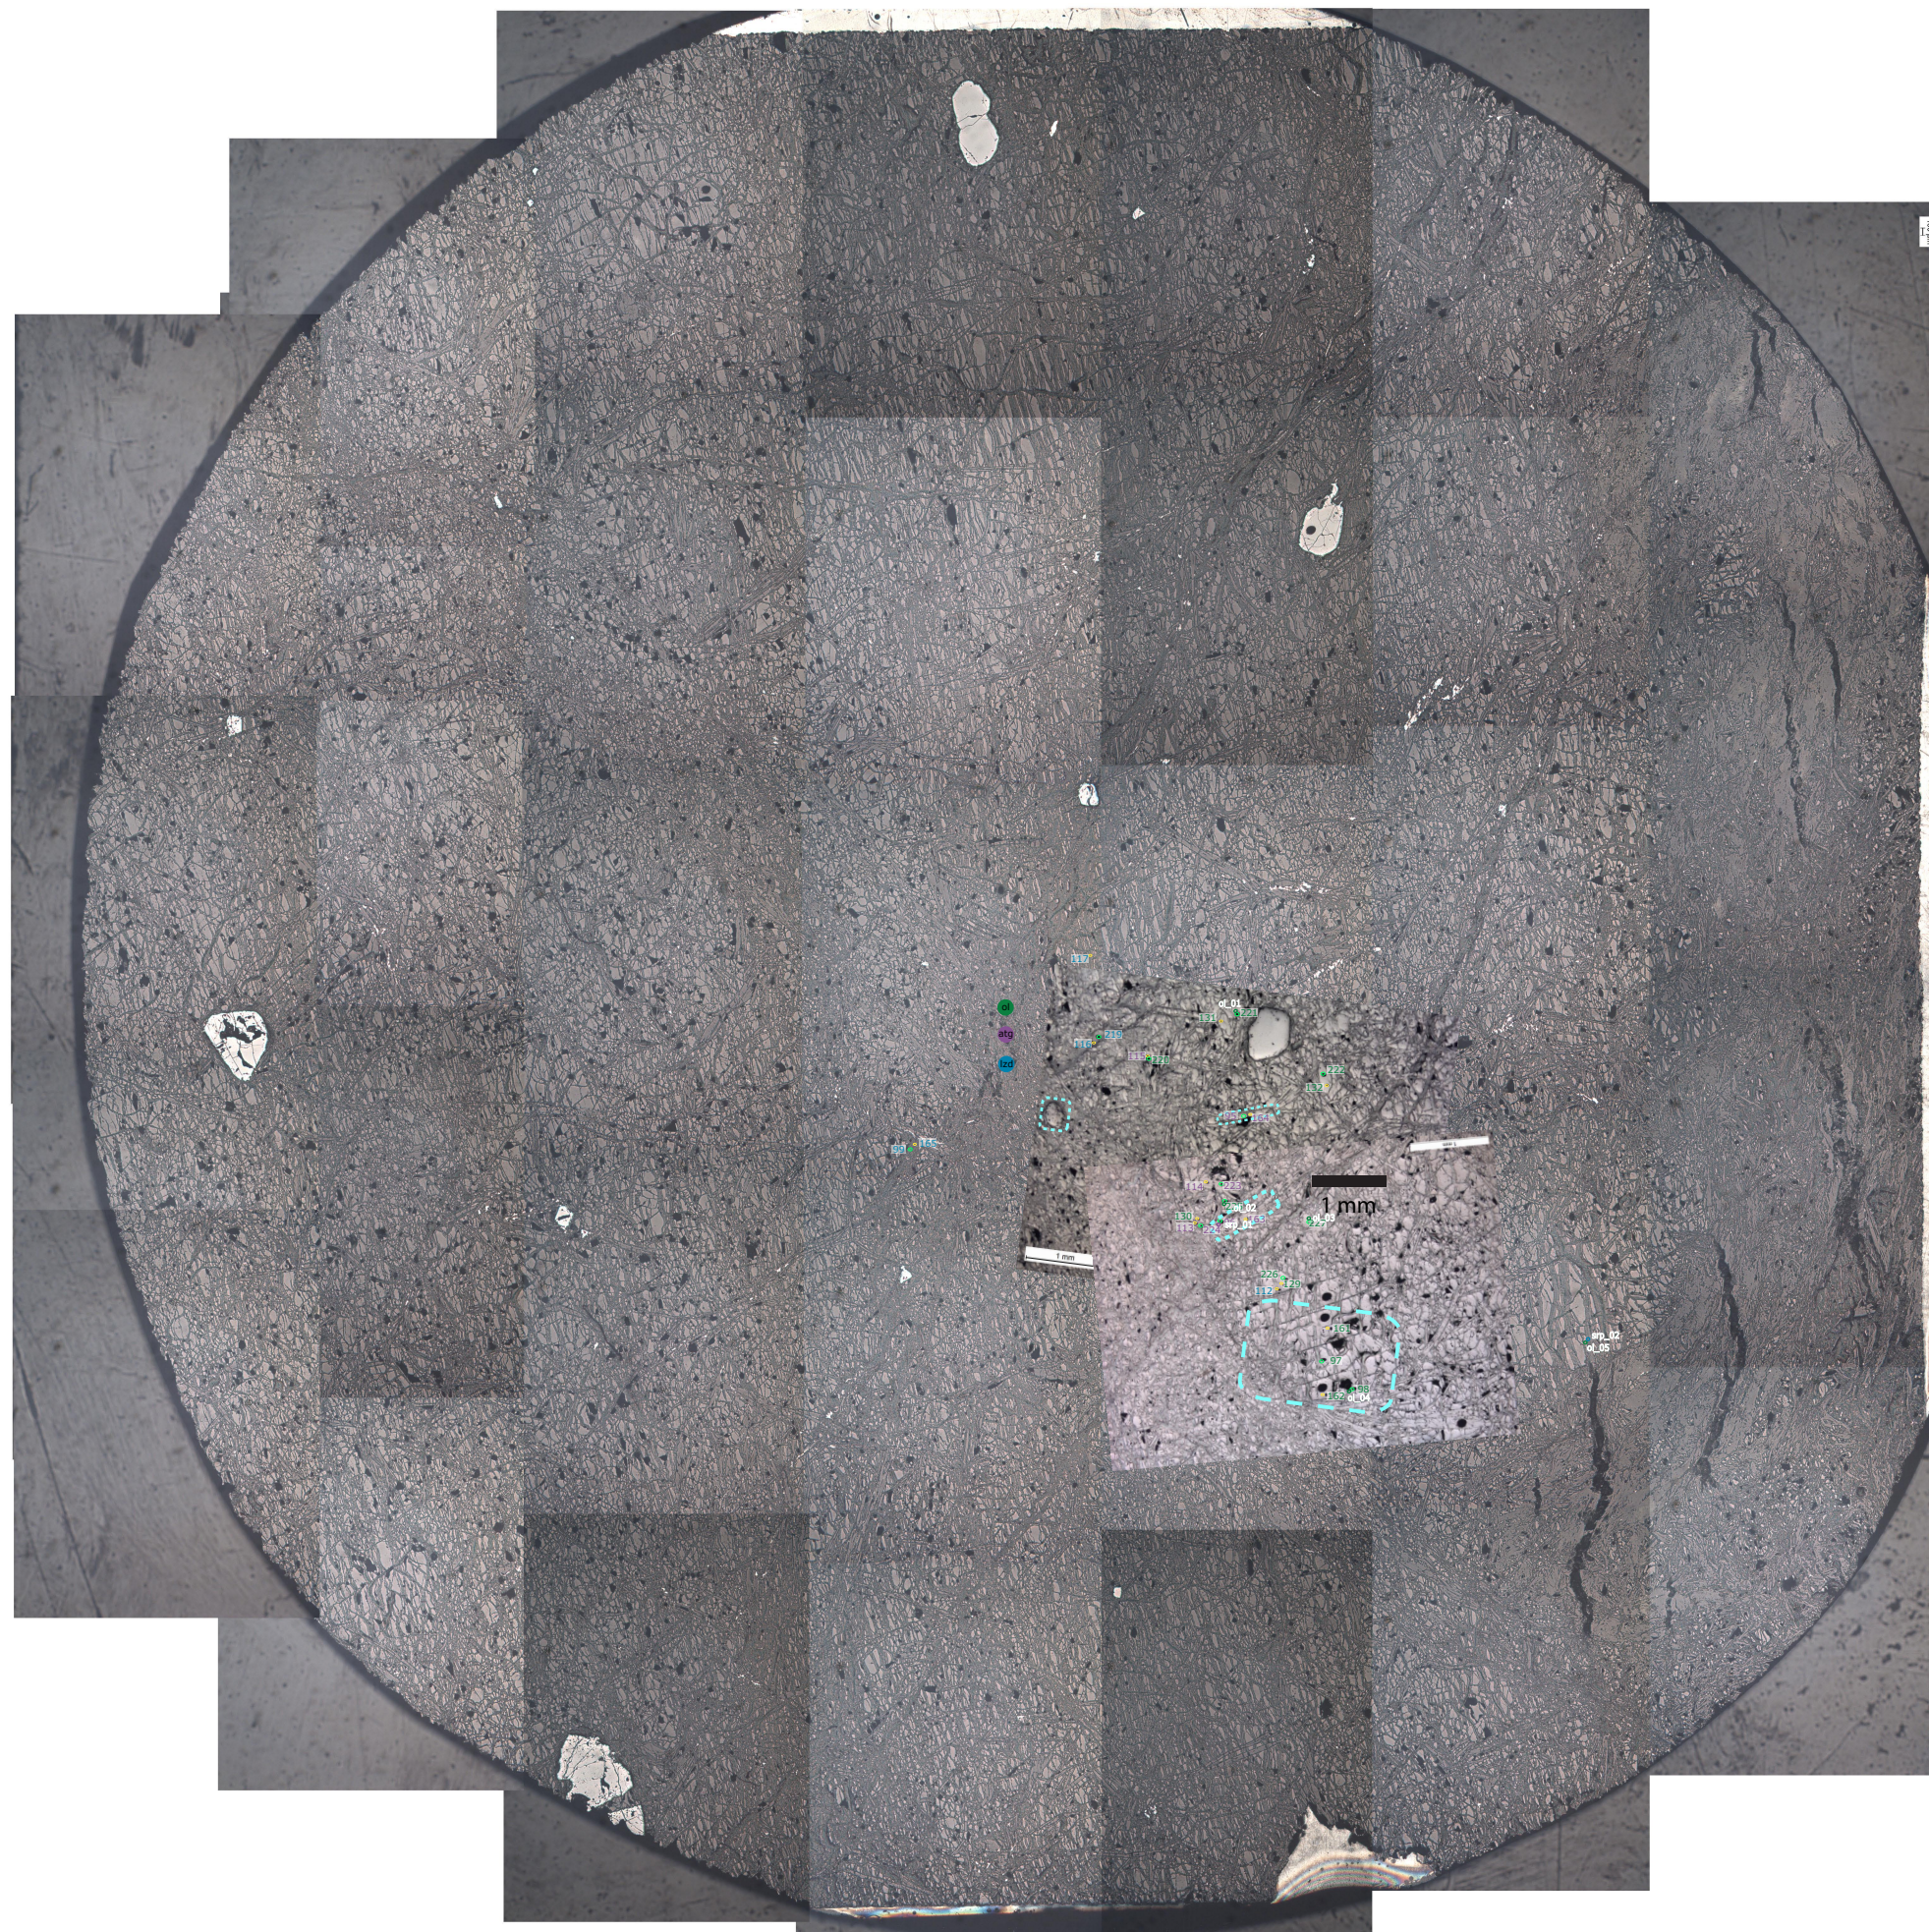



HSS73

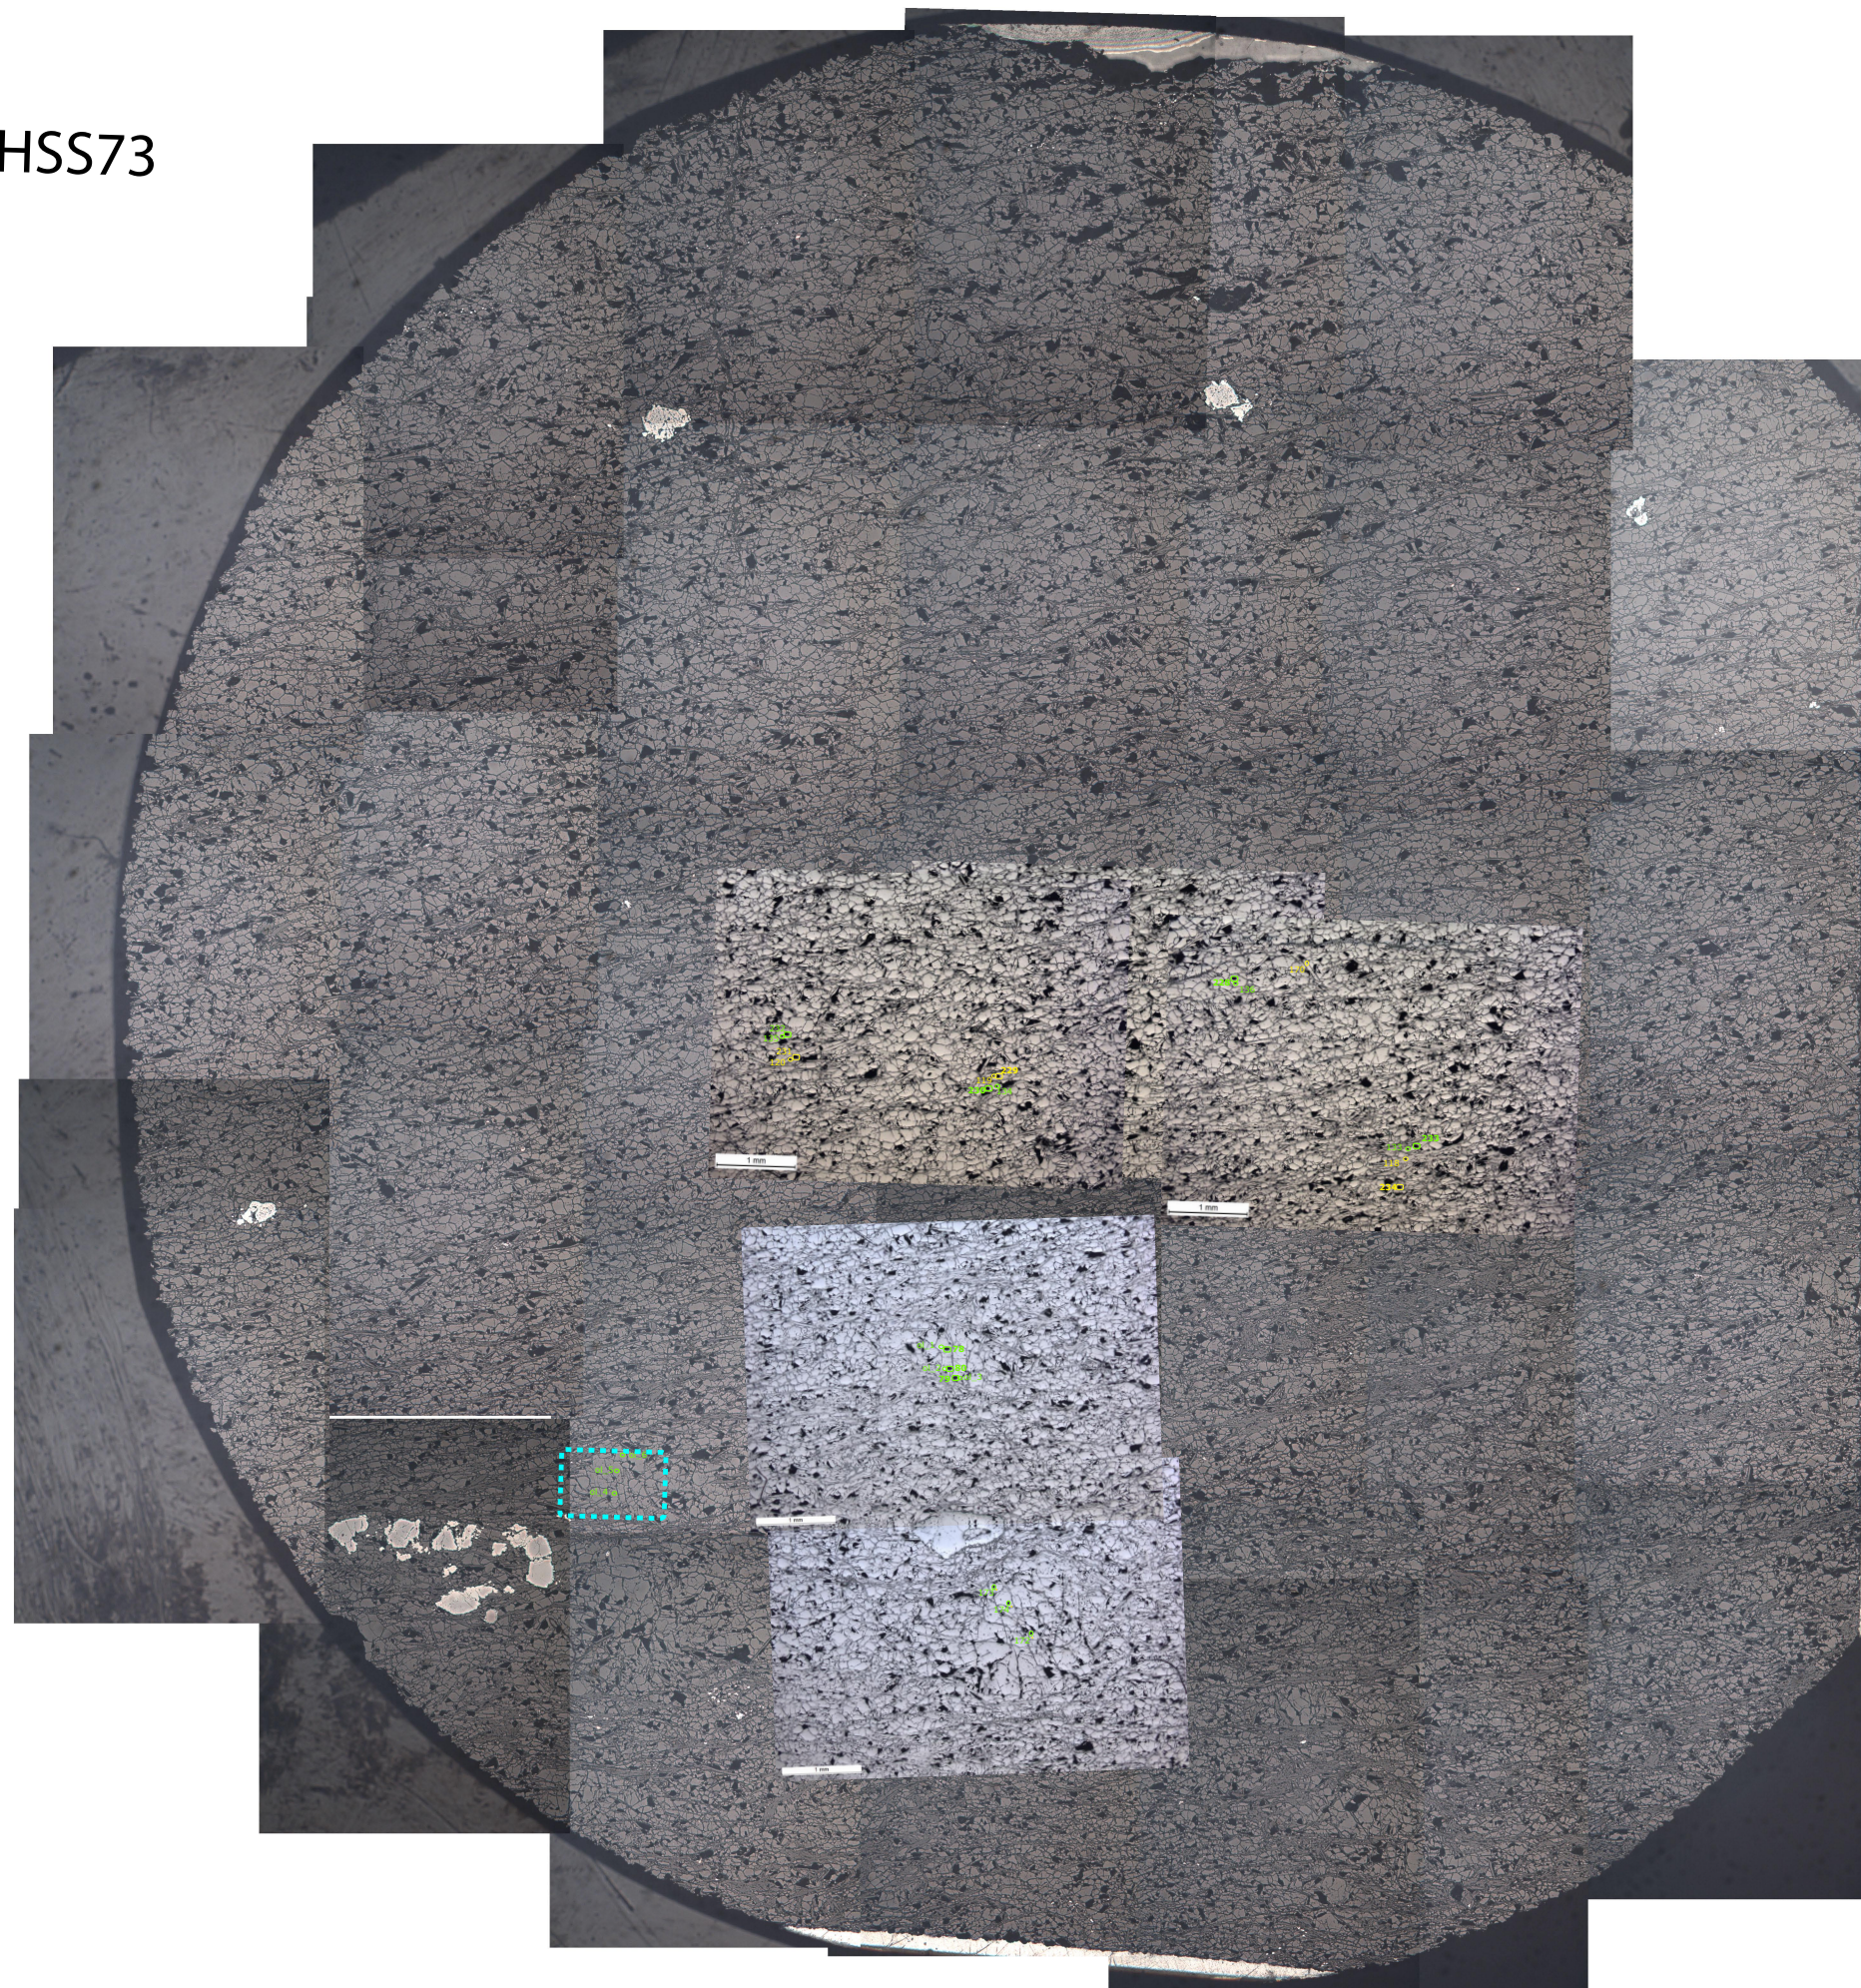

Supplement: Supplementary file 1 [file 1]
